# Supplementary material
Source: PubMed Central journal article supplement (PMC1914100)
Supplement: 7601752s1.pdf [file 7601752s1.pdf]

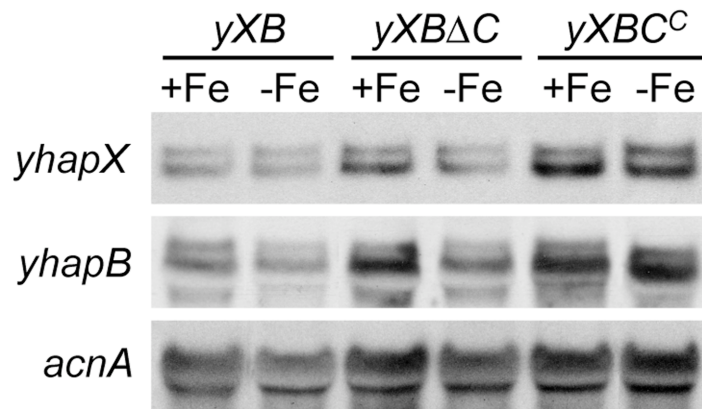

**Supplementary Figure 1 Transcriptional expression of *yhapX* and *yhapB*.** The genes encoding the BiFC split fragments *yhapX* and *yhapB* are constitutively transcribed during +Fe and -Fe conditions in strains *yXB*, *yXBΔC*, *yXBC<sup>C</sup>*.  $\gamma$ -actin-encoding *acnA* was used as a control for loading and RNA quality.
