# Supplementary material
Source: PubMed Central journal article supplement (PMC1914100)
Supplement: 7601752s2.pdf [file 7601752s2.pdf]

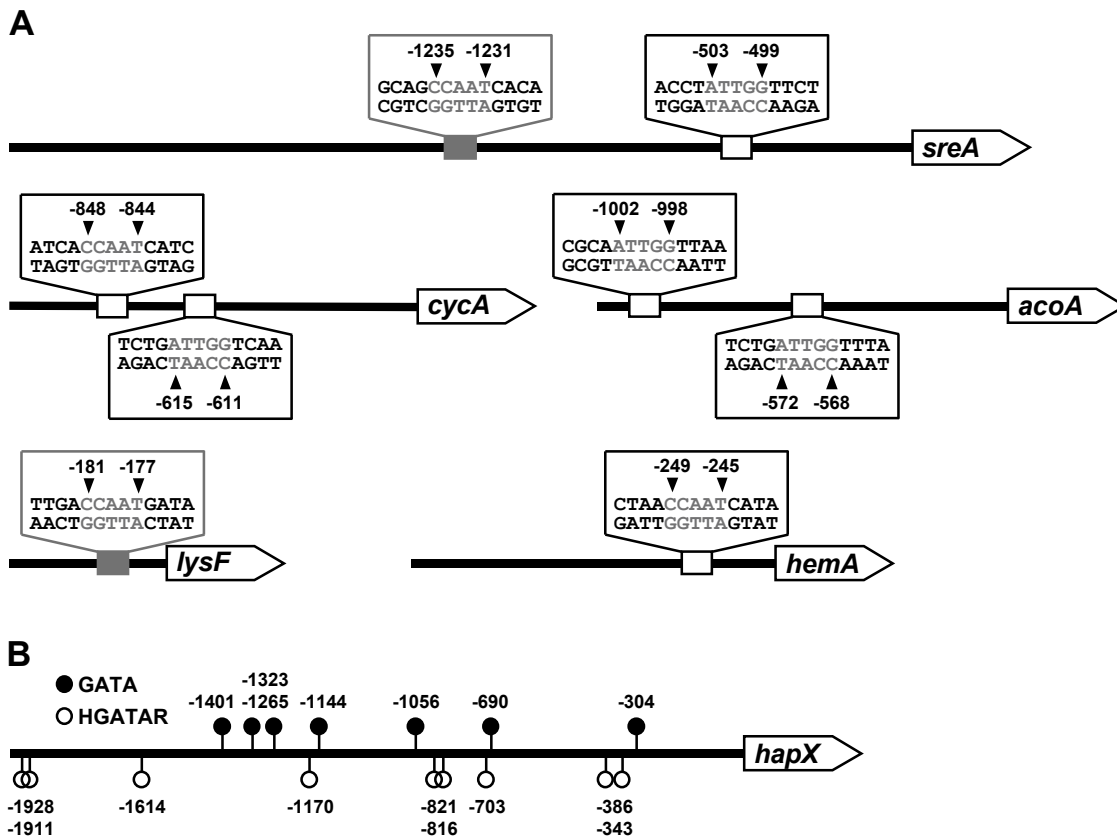

Supplementary Figure 2 (A) CCAAT boxes in the 5'-upstream regions of HapX target genes and (B) GATA-motifs in the 5'-upstream region of *hapX*. CCAAT boxes used in SPR analyses are boxed in grey.
