# Supplementary material
Source: PubMed Central journal article supplement (PMC1914100)
Supplement: 7601752s3.pdf [file 7601752s3.pdf]

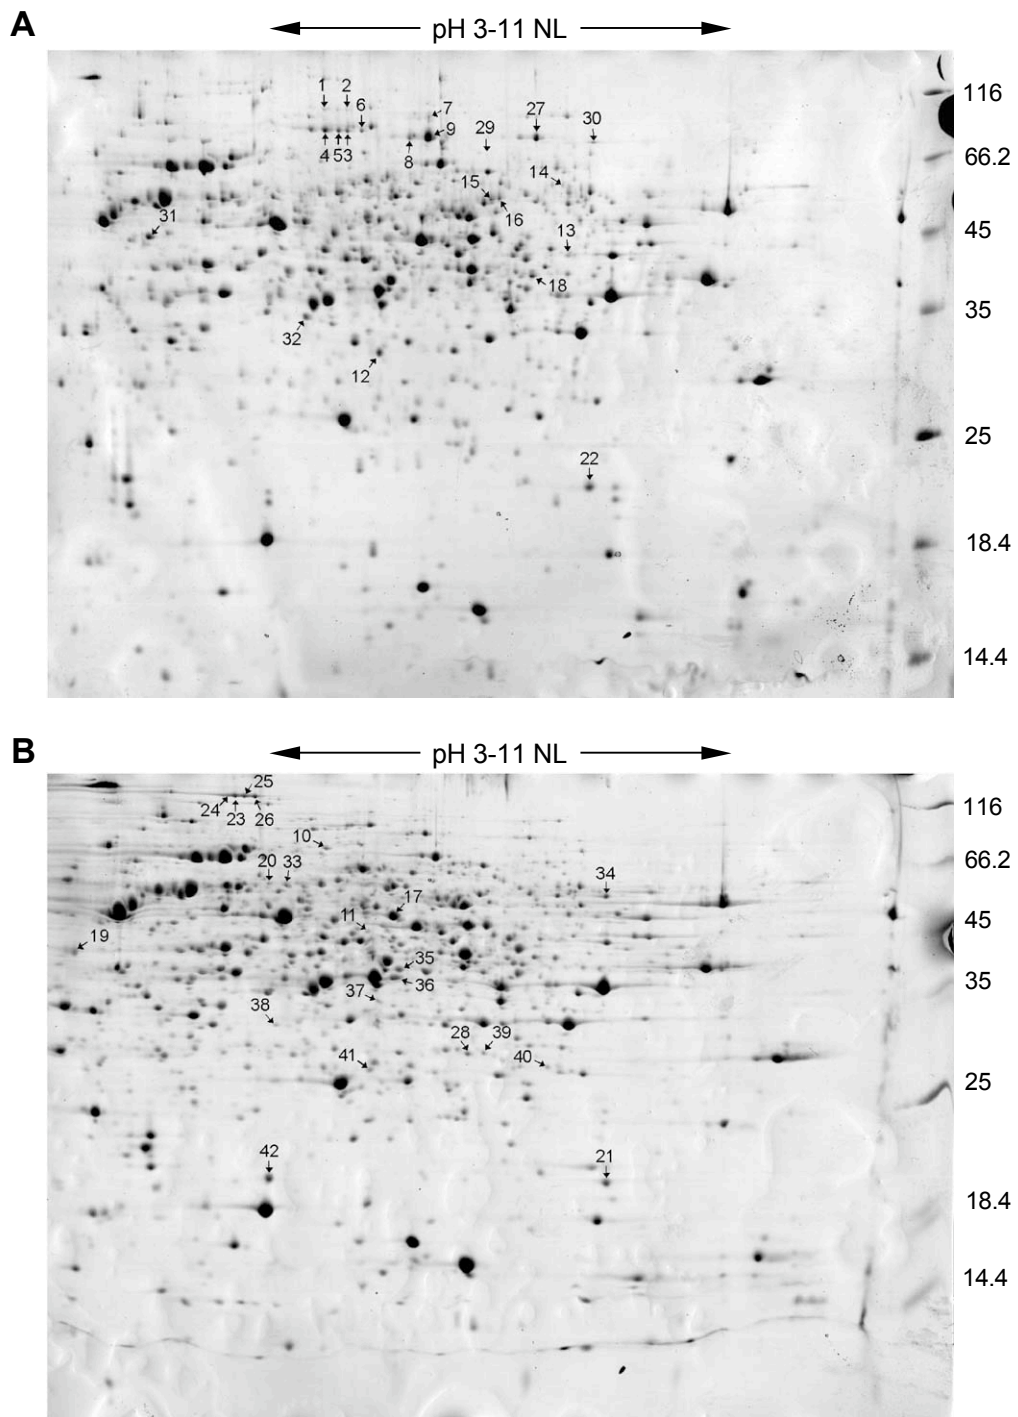

**Supplementary Figure 3 Proteome analysis of (A)  $\Delta hapX$  and (B) the wild type grown during -Fe conditions.** The orientation of the IEF gel is indicated. Molecular mass standards are indicated on the right. Numbers refer to up-regulated proteins in the respective strain (Table II).
