# Supplementary material
Source: PubMed Central journal article supplement (PMC1914100)
Supplement: 7601752s4.pdf [file 7601752s4.pdf]

|    |     |                                                                                                          |     |
|----|-----|----------------------------------------------------------------------------------------------------------|-----|
| An | 1   | MAAQPAL-AIAPSAAPLAPALVAK-----PTVSPSPGP--GTPGSVTSKEWIIIPPRPKPGRKPATD                                      | 58  |
| Nc | 113 | PPIAPRP-SVAPKPAPIRAASVSSQGAMSPVDCPTPGG--GGPLSMTTKEWVIPP RP KPGRKPATD                                     | 175 |
| Ca | 20  | AGSPSSSASTPRSAASPPVSVNTKSSLNNTNSNTIMPR--QVMSIQTSKEWVLP RP KPGRKPSVD                                      | 83  |
| Cn | 70  | ATNIPTSARSPAPRANSSSSTSTAVAATPIMGKDTSSSAGKIFAKPSKEWVLP ER AK PGRKVSND                                     | 135 |
|    |     |                                                                                                          |     |
| An | 59  | TPPTKRKAQNRAAQRAFRRERRAARVSELE <b>EQIKCIEDDHEIHVATFKEQIANLSREVEQCRTE</b> MGW                             | 124 |
| Nc | 176 | TPPTKRKAQNRAAQRAFRRERRAARVGELE <b>DQLEEQKEEHERVSELQGRISHFEVQVQTLQSR</b> CRW                              | 241 |
| Ca | 84  | TPASKRKAQNRAAQRAFRRERRATRVOELE <b>QKLMEVEKERDIKEMALVNTINKLKVENQFLVKN</b> LEQ                             | 149 |
| Cn | 136 | EPDNKRQSQNRLSQR AHRARRTDYIQTLE <b>ERLRQYEAD E IHSNVRLQEVARALKADNERL</b> KAEVNE                           | 201 |
|    |     |                                                                                                          |     |
| An | 125 | WRDRCHALEKEVS-----VERAARETLVKELRSSLP----EKN-----TSGTD                                                    | 163 |
| Nc | 242 | LEDMLEKEKQARN-----TLKNSWDNNNNMSQSFLSQ--QSNGYTLQQQQOQTQOTQLAPKVD                                          | 299 |
| Ca | 150 | LKGEMNQMKQSF SRSQQQLISKSSPAASTASAQQIKPTFSFASNSAPSSHPSPHHNSISPTGSSY                                       | 215 |
| Cn | 202 | LKNKCM EYNGEKD-----VWEMERRTLKEAVRDMRIEIEALRAGSG-----METIVRMDIDQS                                         | 254 |
|    |     |                                                                                                          |     |
| An | 164 | AVPLP-PR-SSR-----SSRMELEKSSPVDR----RS-----ELG--EEVPLGCNR                                                 | 201 |
| Nc | 300 | SVPIAEPRPTAQF----FSISQIISPPEEAPQSF LDVTCGNCQSSGSCACAEELMQSSNVL MGCGG                                     | 361 |
| Ca | 216 | SVQQISPAPSTDSPPNSYNLSNDSYRQFHSTLTPISNN--NTPD-----KPLSAADV AN FDCGV                                       | 272 |
| Cn | 255 | TIDSLVPGPSIP-----RRQSAHRLSPRSAS---RP-----G--NVTLQDCPI                                                    | 292 |
|    |     |                                                                                                          |     |
| An | 202 | CSTS--HCQCIEDAFGMPP IEMNRAPEPKIP----EPEE-----MEIDFTTRF                                                   | 244 |
| Nc | 362 | CTPEG--RCACLEESIRVLAADLKRPLPSSPSL---GPDEKRQRS---DAGVEDMQLETDFTALF                                        | 420 |
| Ca | 273 | CPKE--ECLCESVGLKEPTKDKTENAKKLQDQVNSFKPMPAVSLSRKRKIKSTDEEQEIDFTKQF                                        | 336 |
| Cn | 293 | CPNPDPDCPCQRPHARQEQYPPEHLTLAPSAA-----EDHAVACG-----LCHSTDECLCR                                            | 343 |
|    |     |                                                                                                          |     |
| An | 245 | AA---PHHEEDTAASPVASP----PVD-----PCGFCQDGTPCICAEMAAQEEE-----                                              | 286 |
| Nc | 421 | SS---KKPETMTMPLPAPAQQSQPITSVEMH---ESCGFCCKDGTVCVCAESMALSAASMTVASVV                                       | 421 |
| Ca | 337 | SVKAKPMPDLKLLKKTTF SQPQTETASTFNEDSPVDNCGFCSDDTPCVCREAAKEAAKLNEYLNNP                                      | 402 |
| Cn | 344 | AV-----DEDVKPDISSPSHD-LKTLDD-----DRCGLCTGGDFCACREAAAAASVRTSVTSDT                                         | 396 |
|    |     |                                                                                                          |     |
| An | 287 | -RRR-----NSTFE--SNRLAPIQNI SQFTP----PPSDSDVRS DN-----VTLPPIS----                                         | 327 |
| Nc | 422 | QQVQ-----MHTPPPSSENDVVPMPLEVTATGAVKLPSFGSLNRASN-----TNQDMQSK---                                          | 470 |
| Ca | 403 | HQSSIMEEEISEEAKTLPP-LQTNNPNHNF SKSALPVMHPGPTVEIREFTNINAVPNVLPASKNEN                                      | 467 |
| Cn | 397 | KTTV-----ATTTA--VSGIVTASSSSAALPLRLRTKNGS AKAS IWS---LNAAPAV----                                          | 444 |
|    |     |                                                                                                          |     |
| An | 328 | -----QATAANPCANG-PGTCAACLSDPRRTLFC KTLAASR-----SASGTPSGCCGGK                                             | 376 |
| Nc | 471 | -----RPVKTGGCGPGGPGTCAOCLADPKSGLFCRSLAANFERNRQQTDNSSSAAPPSGCCGGG                                         | 529 |
| Ca | 468 | EKEESTKDTSSDGGCTGN-PGTCRQCQMDPMS TLFC TTVASRSTKSDSVSS TRQISIR TNSKTSIS                                   | 532 |
| Cn | 445 | -----S-REAICTGD-PSNCDACRDSFGREFCQHLFEAAE-----SSSSVKPCSSCPGN                                              | 492 |
|    |     |                                                                                                          |     |
| An | 377 | GRDGGCCQSQS-----RTSAPRRSN-----TDRSATPLTLSCAD                                                             | 410 |
| Nc | 530 | GPGGGCCKTEKPDNDVVPINLNRYKTANQLPAPTSPNPISSSSSSSNVAASN FALSLSCAE                                           | 593 |
| Ca | 533 | IDSLNPNQSP I P P P L L A N N K T G ---G S N A P T P T P A P S T P S H S S ---S V S S N S G I F I P C A D | 586 |
| Cn | 493 | CMNVKAGLSPSPGITQASSSSS-----NQIRTPPTPPVNQPS-----AVEDDTPLAPLQMVCCG                                         | 546 |

**Supplementary Figure 4 Alignment of *A. nidulans* HapX (An) with putative orthologs of *Neurospora crassa* (Nc), *Candida albicans* (Ca), and *Cryptococcus neoformans* (Cn).** Amino acid residues identical in all four proteins are shaded, the bZip region is boxed and conserved cysteine-rich motifs are marked by bars.
