# Supplementary material
Source: PubMed Central journal article supplement (PMC1914100)
Supplement: 7601752s6.pdf [file 7601752s6.pdf]

## Supplementary Table II Oligonucleotides used in this study

### A) Amplification of hybridization probes

| Gene        | Oligonucleotide | Sequence 5'→3'       |
|-------------|-----------------|----------------------|
| <i>sreA</i> | o1_ <i>sreA</i> | ATCGCCAGAAGCATCGT    |
|             | o2_ <i>sreA</i> | ACTGAAAAGGTTATCGCT   |
| <i>mirB</i> | o1_ <i>mirB</i> | GTATATCTTCGCGCAGGG   |
|             | o2_ <i>mirB</i> | AACCCATCAACACCCGAG   |
| <i>sidA</i> | o1_ <i>sidA</i> | CGCAGCAGCTTCACCTTC   |
|             | o2_ <i>sidA</i> | CGTCGGGGTTTTCACTC    |
| <i>sidC</i> | o1_ <i>sidC</i> | GCACCAGGTCATTGAGTACC |
|             | o2_ <i>sidC</i> | TCGTCAGCATGCTCTGGACG |
| <i>catB</i> | o1_ <i>catB</i> | ATGCGTACAGCCCAAC     |
|             | o2_ <i>catB</i> | TTTGGACTCATCTAGGC    |
| <i>cycA</i> | o1_ <i>cycA</i> | ACCCTTTCTCTTACCTC    |
|             | o2_ <i>cycA</i> | CGCGATTAGACGAGATAA   |
| <i>acoA</i> | o1_ <i>acoA</i> | TATCCATGTAGTCCGCC    |
|             | o2_ <i>acoA</i> | GGTCCCCTGTCCAATGC    |
| <i>lysF</i> | o1_ <i>lysF</i> | GCTGACGAACGAAGAAG    |
|             | o2_ <i>lysF</i> | GCGTTCTTAACCCATTC    |
| <i>hemA</i> | o1_ <i>alaA</i> | CAGAAGAAGCACCAGGAC   |
|             | o2_ <i>alaA</i> | GGTGTCAACTAAAGCGGC   |
| <i>hapX</i> | o1_ <i>hapX</i> | GACACGCCTCCAACAAAG   |
|             | o2_ <i>hapX</i> | CTTCGAGGATCTGAGAGG   |
| <i>hapC</i> | o1_ <i>hapC</i> | CAAGGTCAGGGAGAGTTC   |
|             | o2_ <i>hapC</i> | TTATCAGAGGCTTCGGGG   |
| <i>acnA</i> | o1_ <i>acnA</i> | CGGTGATGAGGCACAGT    |
|             | o2_ <i>acnA</i> | CGGACGTCGACATCAACA   |

### B) PCR-screening of the progeny of sexual crosses

| Allele                            | Oligonucleotide | Sequence 5'→3'      |
|-----------------------------------|-----------------|---------------------|
| <i>sreA</i>                       | o3_ <i>sreA</i> | CAGCGAACTTAGTCATCC  |
|                                   | o4_ <i>sreA</i> | TTACTAAGACCGTCC AGG |
| $\Delta$ <i>sreA</i>              | o3_ <i>sreA</i> | CAGCGAACTTAGTCATCC  |
|                                   | o1_ <i>argB</i> | ATGTCACGAATGCGGAGT  |
| <i>hapX</i>                       | o1_ <i>hapX</i> | GACACGCCTCCAACAAAG  |
|                                   | o3_ <i>hapX</i> | GAAAAGCACACGAACGCC  |
| $\Delta$ <i>hapX</i>              | o3_ <i>hapX</i> | CTGTTCTCCTTCCCCTCC  |
|                                   | o2_ <i>argB</i> | CGCATACTCTCCACAATCC |
| <i>hapB</i>                       | o1_ <i>hapB</i> | CTGCGGTGGTTCCTTTGTC |
|                                   | o2_ <i>hapB</i> | ATTCTCCTGTCCACCTGC  |
| $\Delta$ <i>hapB</i>              | o1_ <i>hapB</i> | CTGCGGTGGTTCCTTTGTC |
|                                   | o3_ <i>argB</i> | GGTCACTTGTCTTCCCTG  |
| $\Delta$ <i>hapB</i> <sup>+</sup> | o1_ <i>alcA</i> | CCAATCCTATCACCTCGC  |
|                                   | o2_ <i>hapB</i> | ATTCTCCTGTCCACCTGC  |

### C) Recombinant production of HapB, HapC, HapE, HapE-ΔNΔA and HapX

| Gene        | Oligonucleotide | Sequence <sup>1</sup> 5'→3'                                           |
|-------------|-----------------|-----------------------------------------------------------------------|
| <i>hapB</i> | HapBct-for      | ATATACATATGTCTGGTTCTCATCATCATCATCA<br>TAG CGGATCCCCGCACGTGCAGAACGCCAG |
|             | HapB-r          | ACGTA <u>AAGCTT</u> TCAGCCATCTTCATCCGAGGGAC                           |
| <i>hapB</i> | HapB-for        | AACTGGGATCCATGGAATATTCTCCACAATATC                                     |
|             | HapB-r          | ACGTA <u>AAGCTT</u> TCAGCCATCTTCATCCGAGGGAC                           |
| <i>hapC</i> | TEVHapC-for     | AACTGGGATCCGAGAACCTGTACTTCCAGATGTCGT<br>CGACCTCTCCCTCCAAG             |
|             | HapC-r          | ACGTA <u>AAGCTT</u> CTAATAAGATTTCGCCACCAGCTCCGT<br>TATG               |
| <i>hapE</i> | TEVHapE-for     | AACTGGGATCCGAGAACCTGTACTTCCAGATGGAGC<br>AAGCCCAGCAGACTTCTG            |
|             | HapE81f         | AACTGGGATCCGATTATAAAATCCACCAACTCCCC<br>TAGC                           |
|             | HapE-r          | ACGTA <u>AAGCTT</u> TTCACTGCTGCGGGGGTAAATGAG                          |
| <i>hapX</i> | hapX-for        | CCATGGCAGCTCAGCCAGCCCT                                                |
|             | hapX-rev        | CCATGGTTTGTTCGGCAAATCTTCGGTC                                          |
| <i>hapX</i> | HapXf           | AACTGGGATCCATGGCAGCTCAGCCAGCCCTC                                      |
|             | HapXr           | ACGTA <u>AAGCTT</u> TTATTTGTTCGGCAAATCTTCGGTCAAA<br>ATA ACGCAG        |

<sup>1</sup> Introduced restriction enzyme sites are underlined.

### D) SPR analysis

| Promoter    | Oligonucleotide | Sequence <sup>1</sup> 5'→3'                                            |
|-------------|-----------------|------------------------------------------------------------------------|
| <i>sreA</i> | SREACB1         | CGCCACCGAGTCTCGCTGCAG <u>CCAAT</u> CACAGCAAG<br>CGTGATGACACTAC         |
|             | B-SREACB1i      | Biotin-GTAGTGTATCACGCTTGCTGTG <u>ATTGG</u> CTGC<br>AGCGAGACTCGGTGGGCG  |
| <i>lysF</i> | LYSFC1          | GTCTTGAAGACCGGGTTG <u>ACCAAT</u> GATAATCCGCGC<br>CACCTGATTCGTCA        |
|             | B-LYSFC1i       | Biotin-TGACGAATCAGGTGGCGCGGATTATC <u>ATTGG</u> T<br>CAACCCGGTCTTCAAGAC |

<sup>1</sup> CCAAT boxes are underlined.

### E) BiFC analysis of HapX/CBC interaction

| Gene        | Oligonucleotide | Sequence <sup>1</sup> 5'→3'               |
|-------------|-----------------|-------------------------------------------|
| <i>hapB</i> | HapB 5'NcoI     | <u>CCATGGA</u> ATATTCTCCACAATATCAACAACAAC |
|             | HapB 3'NotI     | GCGGCCGCTGCCATCTTCATCCGA                  |
| <i>hapC</i> | HapC BiFC       | CCAACAGCTCCATGGCAATGTCGTCGACC             |
|             | HapC 3'NcoI     | AACCATGGGAGGGTATCCATAAGCTGAGGC            |
|             | BiFC            |                                           |
| <i>hapX</i> | HapX 5'NcoI     | <u>CCATGGC</u> AGCTCAGCCAGCCCTC           |
|             | HapX 3'NotI     | GCGGCCGCTTTTGTTCGGCAAATCTTCG              |

<sup>1</sup> Introduced restriction enzyme sites are underlined.
